# Supplementary material for: Analysis of Several Pathways for Efficient Killing of Prostate Cancer Stem Cells: A Central Role of NF-κB RELA
Source: MDPI journal article supplement (doi:10.3390/ijms22168901), 2021-08-18
Supplement: s1 [file s1]

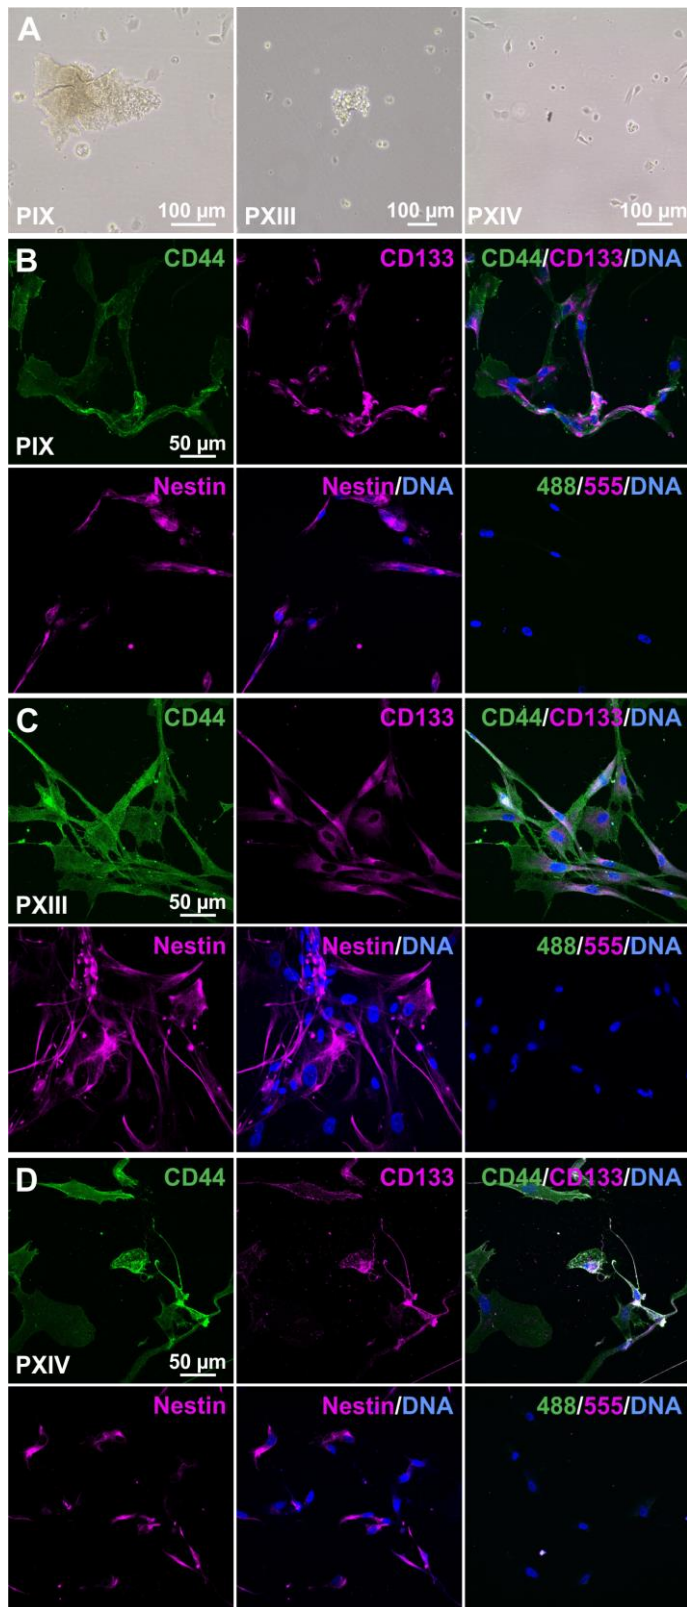

**Figure S1:** Potential sphere formation as well as CD44/CD133 and Nestin immunostainings of cultured PIX, PXIII and PXIV PCSC populations.

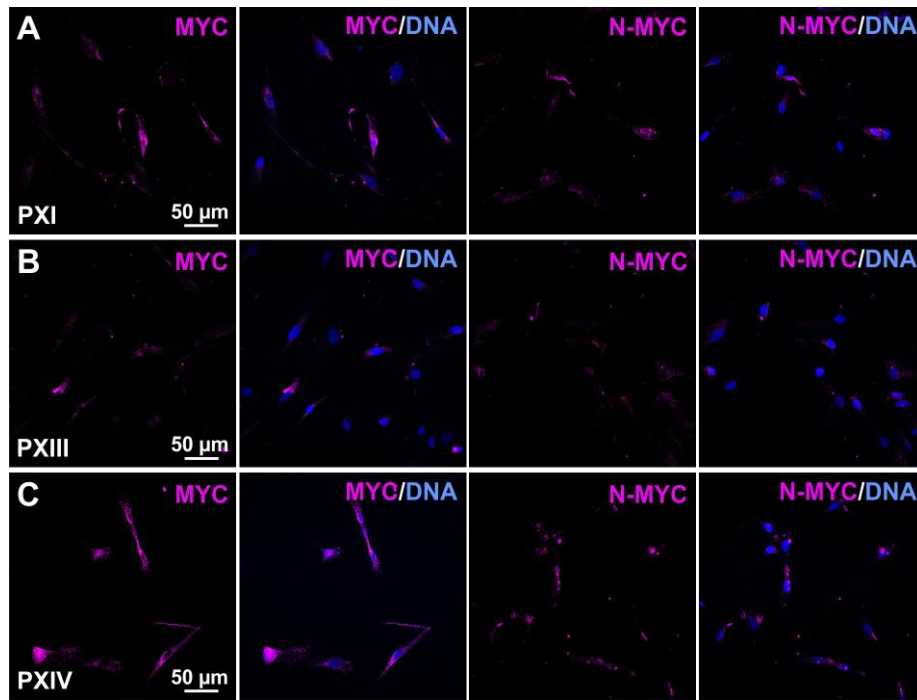

**Figure S2:** MYC and N-MYC immunocytochemistry of PXI, PXIII and PXIV PCSC populations.

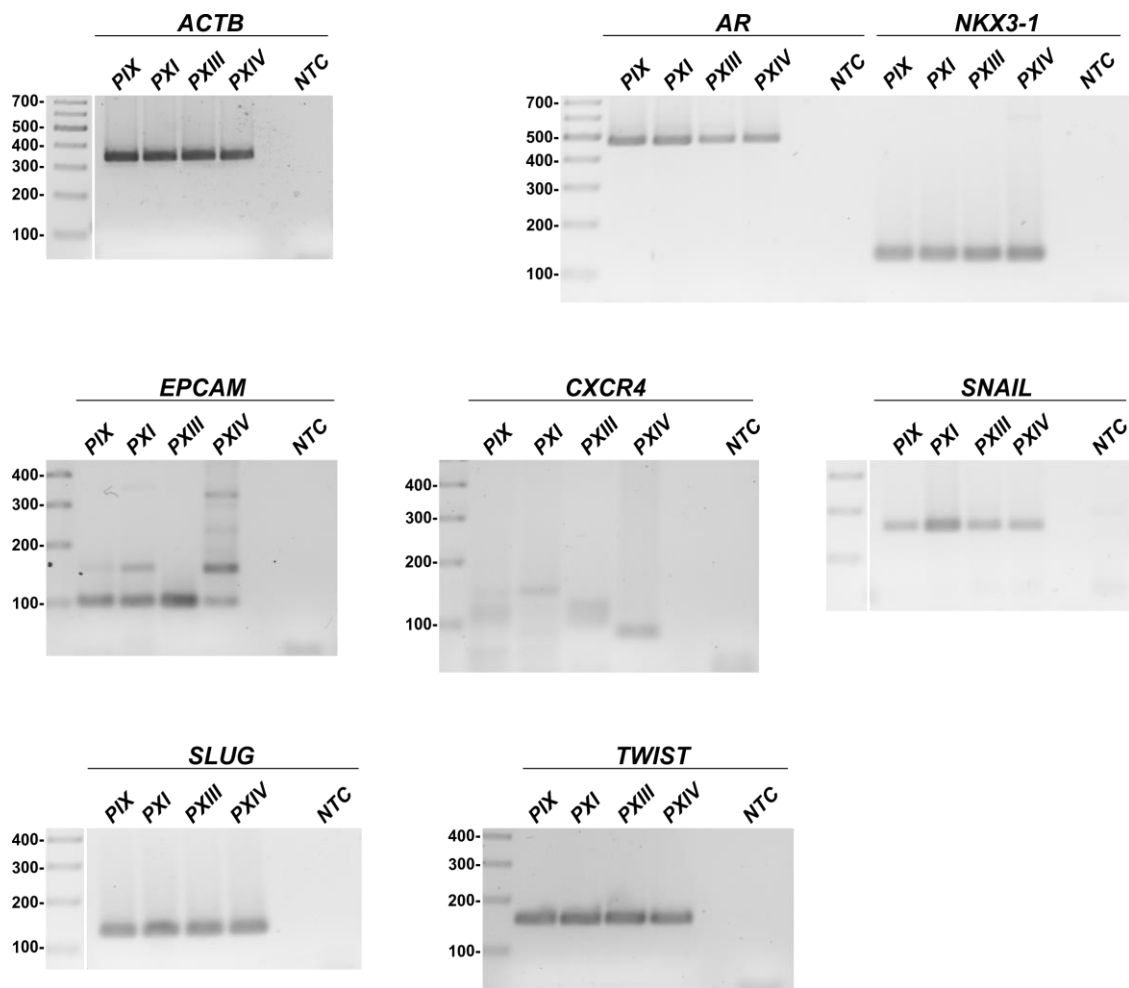

**Figure S3:** Full size RT-PCR images of analyzed target gene expressions in PCSC populations.

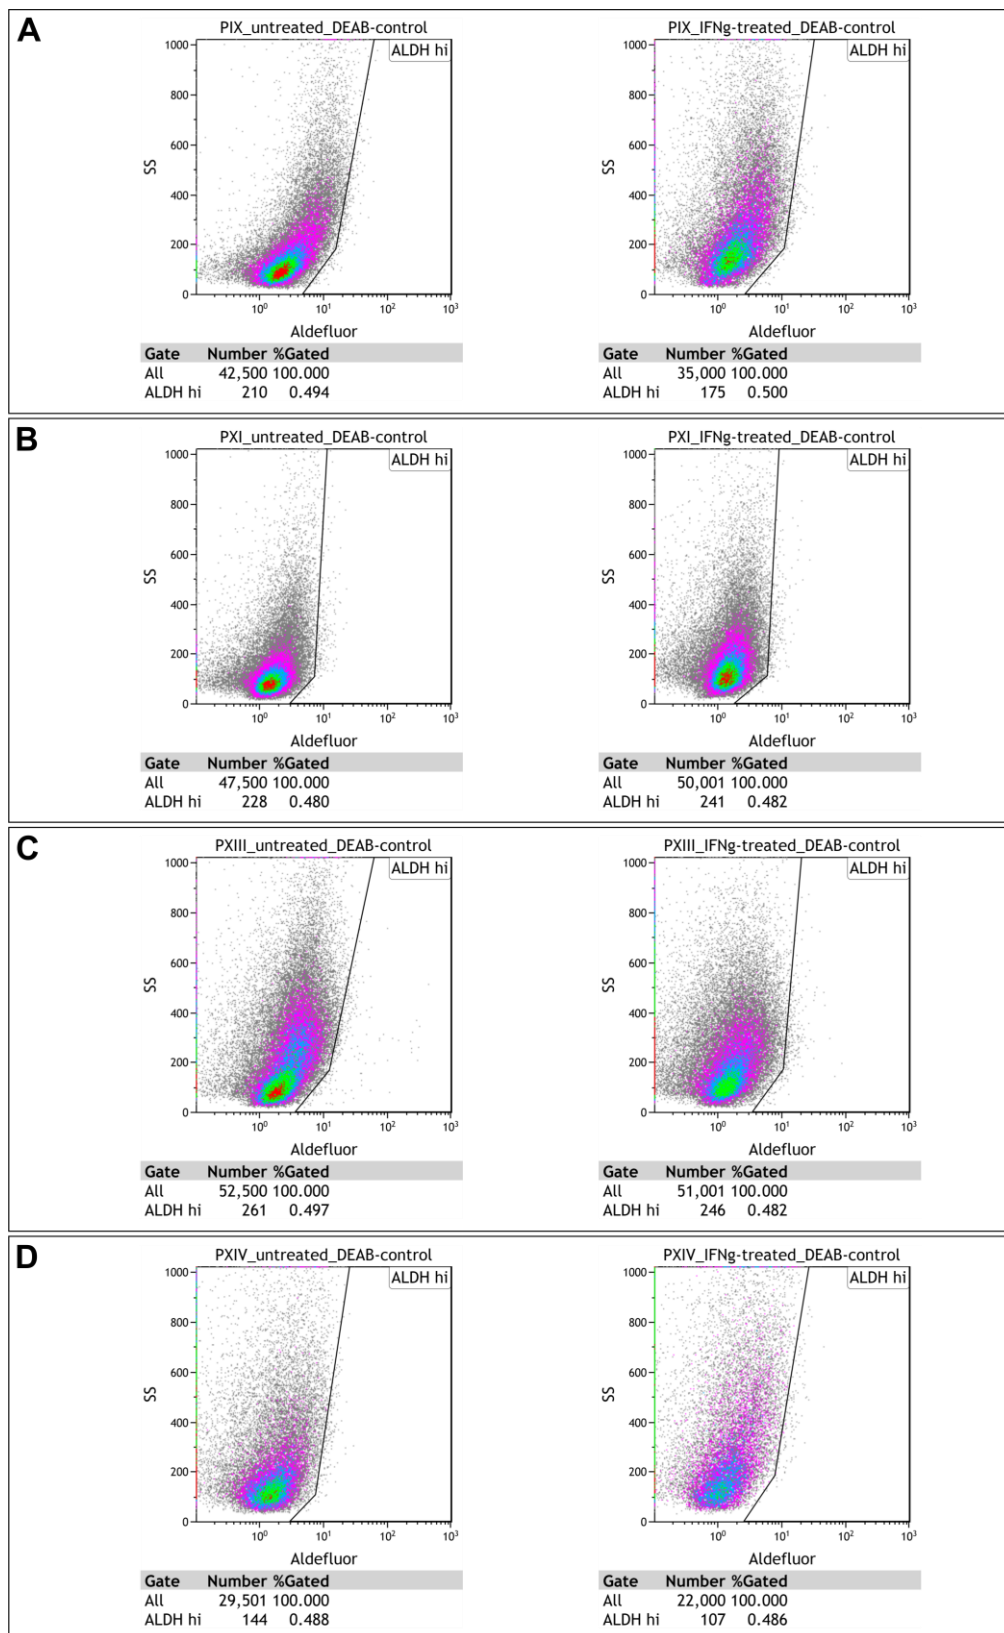

**Figure S4:** DEAB controls of flow cytometric-analyzed ALDH expressions.

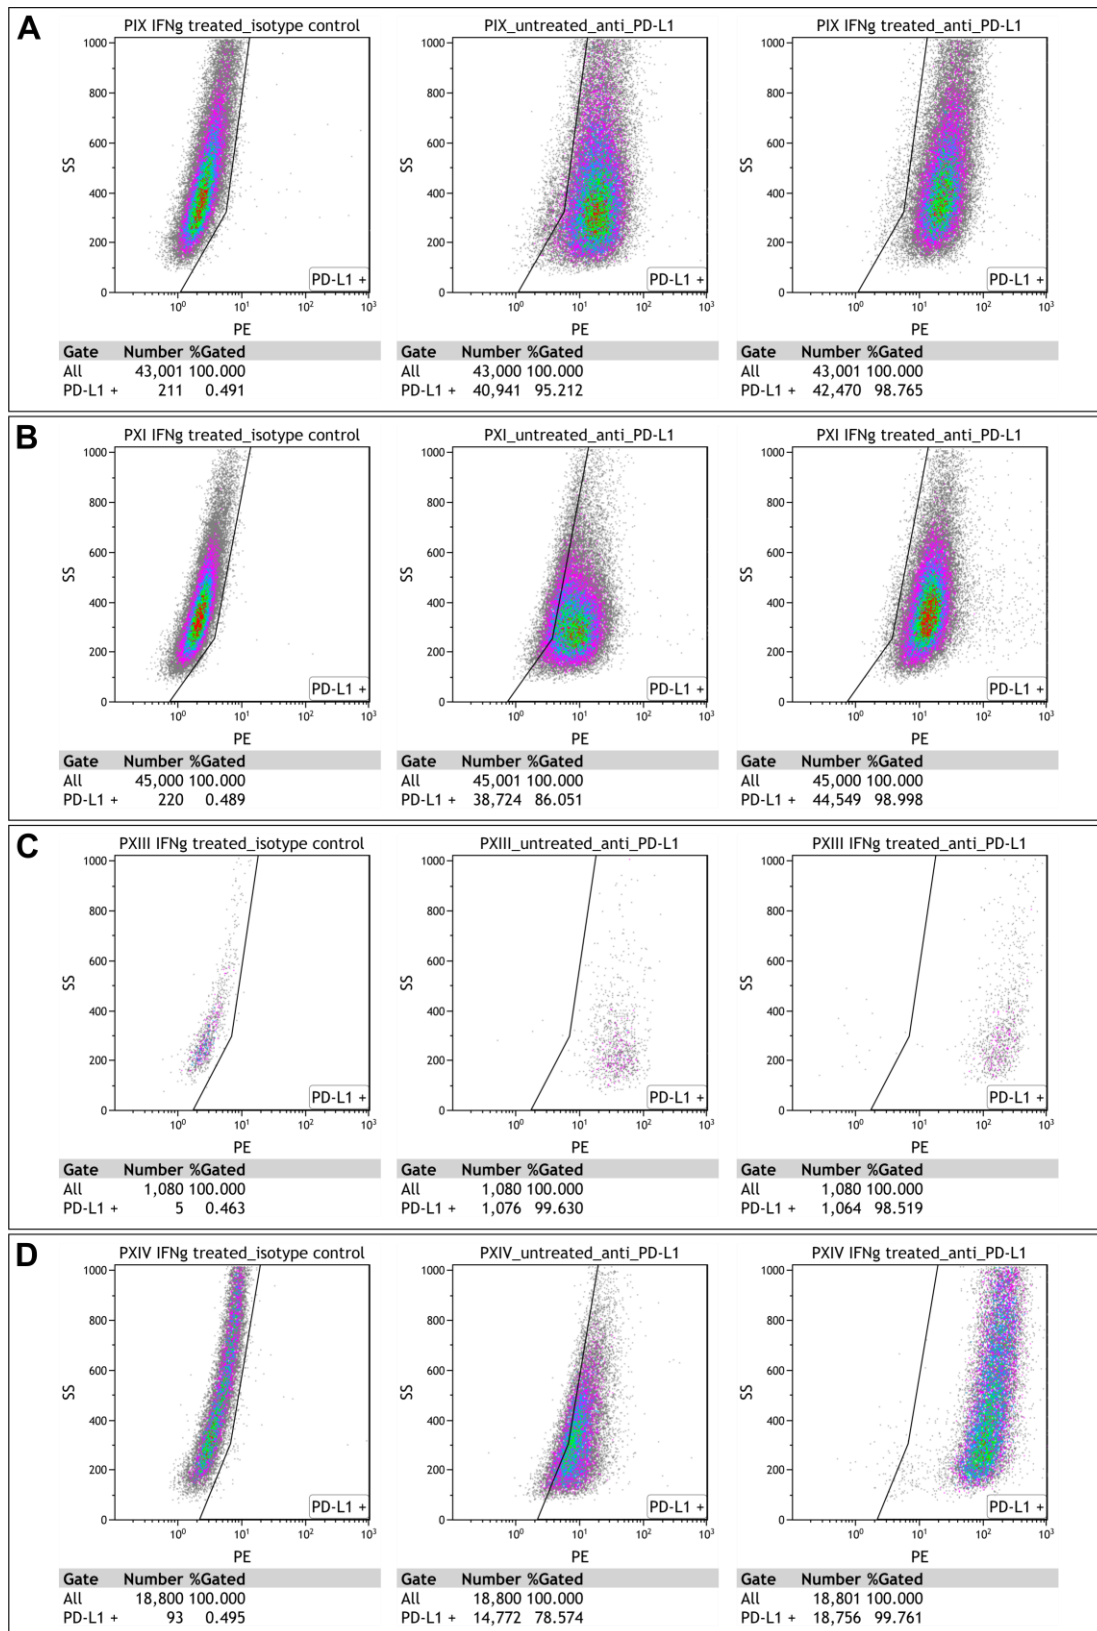

**Figure S5:** Dot plots including gating strategies of flow cytometric-analyzed PD-L1 expressions.

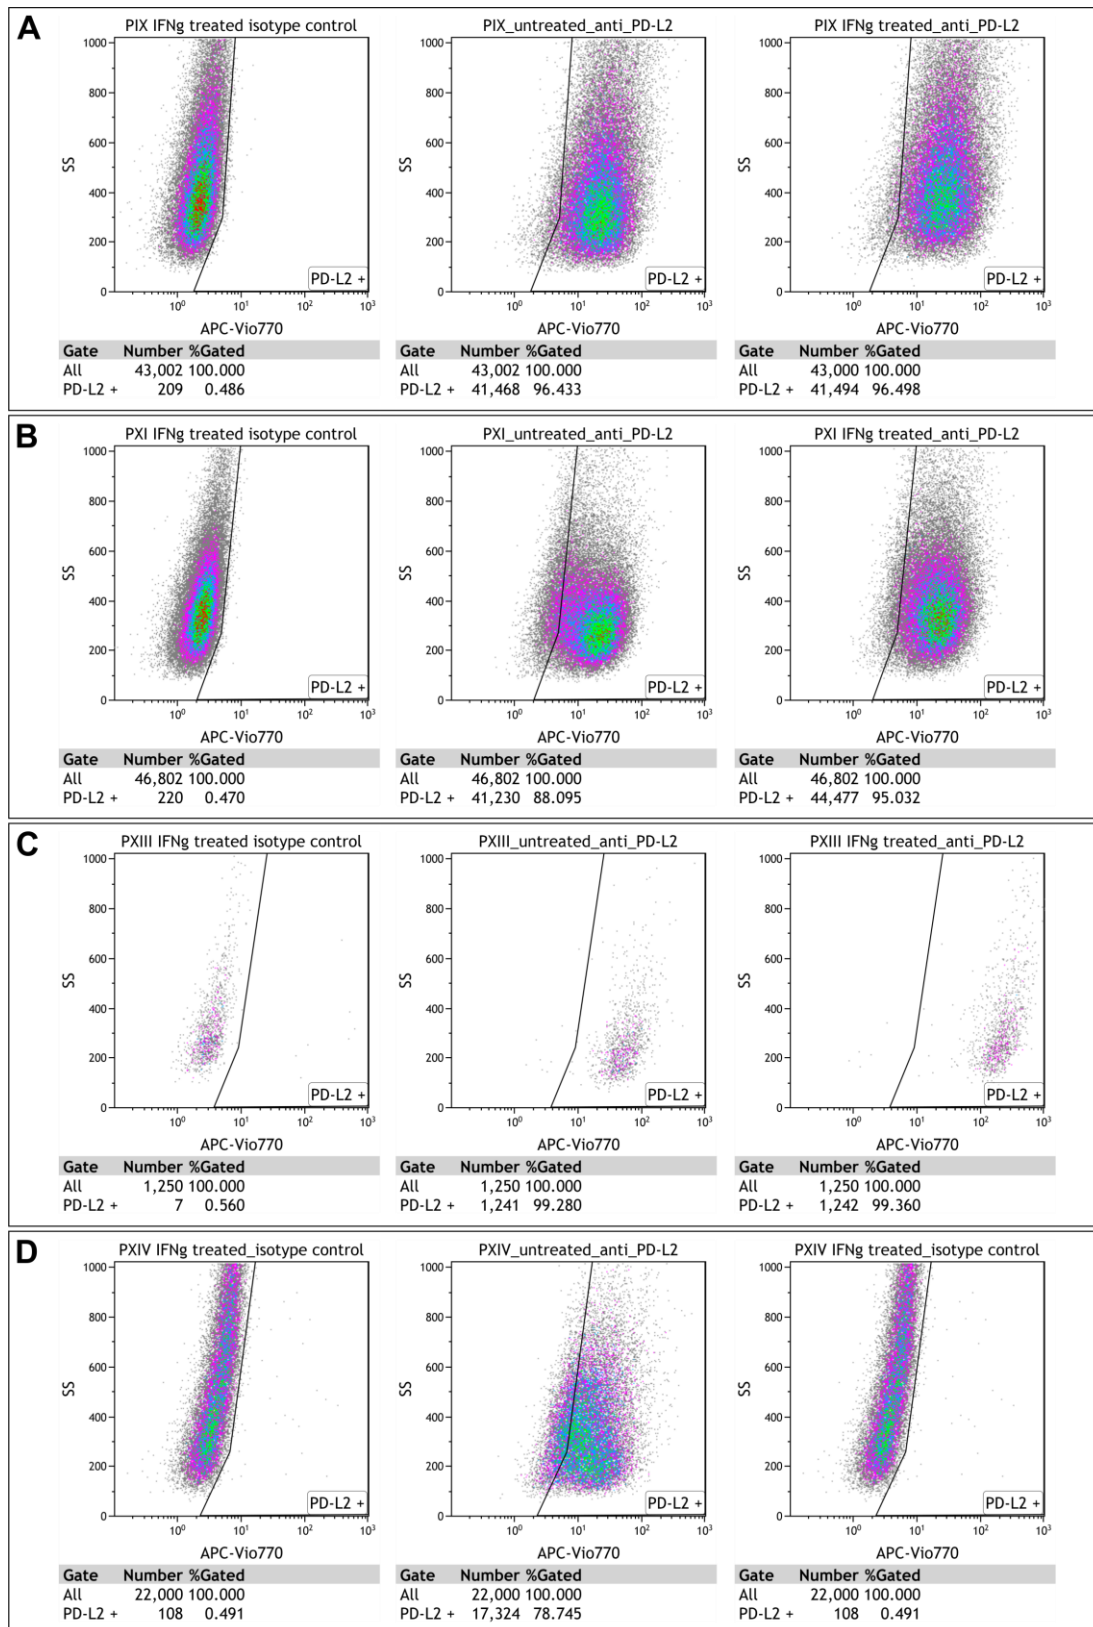

**Figure S6:** Dot plots including gating strategies of flow cytometric-analyzed PD-L2 expressions.

**Table S1:** Mean fluorescence intensities of PD-L1 and –L2 after flow cytometric analysis.

| Sample ID | Condition                | Mean fluorescence intensity |           |
|-----------|--------------------------|-----------------------------|-----------|
|           |                          | (MFI) PD-L1                 | MFI PD-L2 |
| PIX       | control                  | 21,649                      | 29,275    |
|           | IFN $\gamma$ pre-treated | 28,364                      | 35,591    |
| PXI       | control                  | 10,172                      | 20,110    |
|           | IFN $\gamma$ pre-treated | 18,206                      | 24,397    |
| PXIII     | control                  | 44,854                      | 62,699    |
|           | IFN $\gamma$ pre-treated | 223,453                     | 249,716   |
| PXIV      | control                  | 11,384                      | 20,841    |
|           | IFN $\gamma$ pre-treated | 153,728                     | 104,884   |



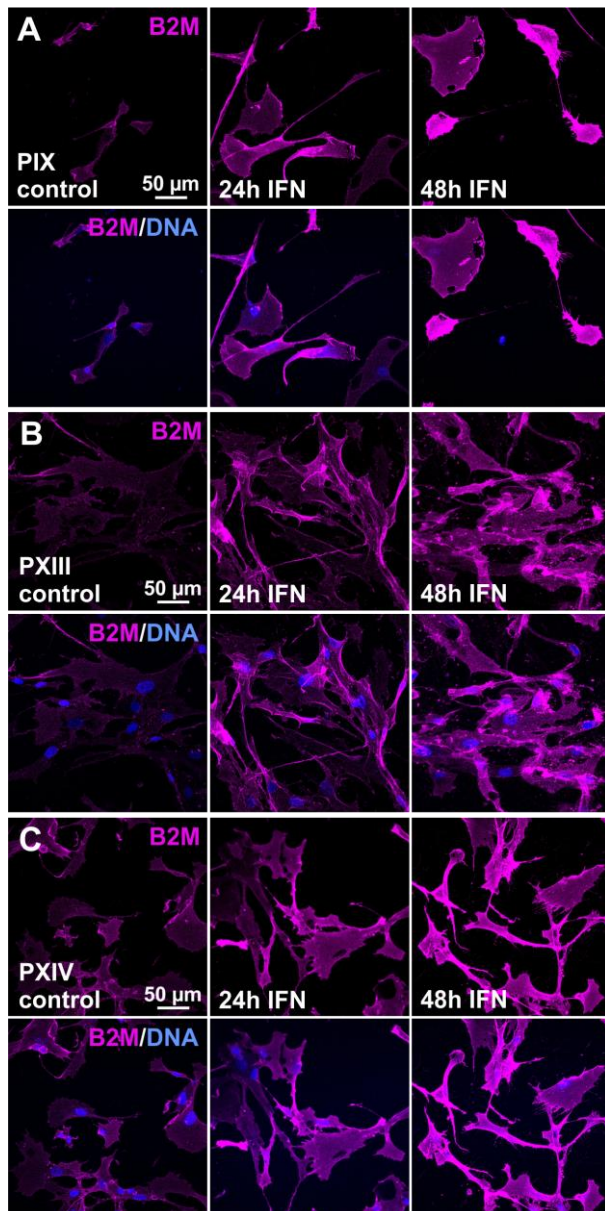

**Figure S7:** Exemplary B2M immunostainings of IFN $\gamma$ -treated PIX, PXIII and PXIV PCSC populations.



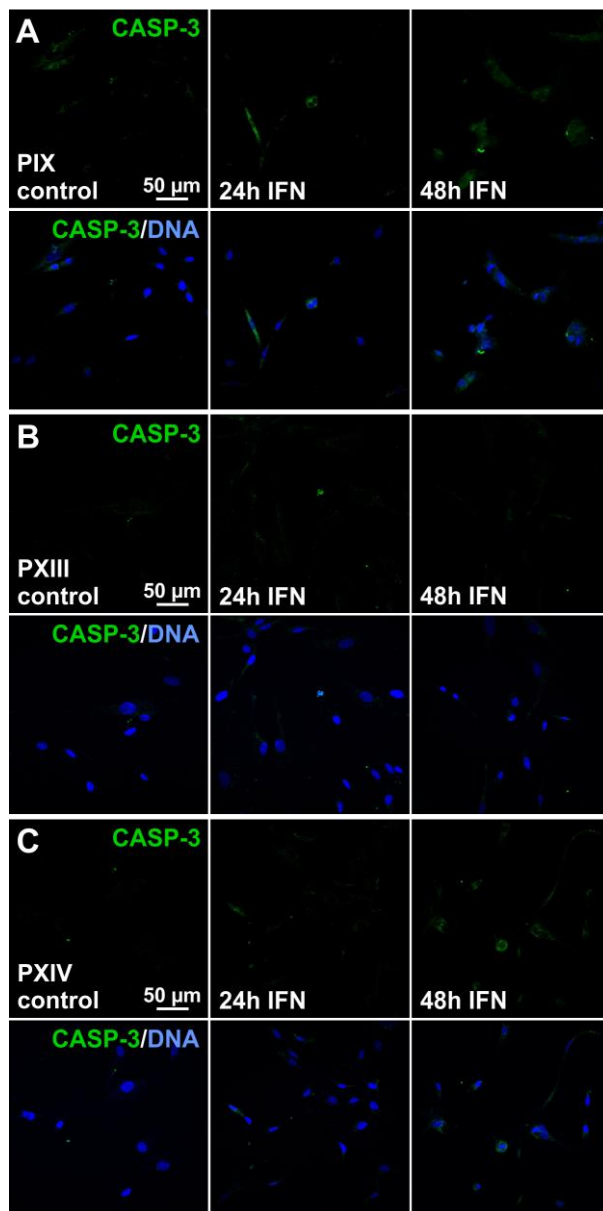

**Figure S8:** Exemplary CASP-3 immunostainings of IFN $\gamma$ -treated PIX, PXIII and PXIV PCSC populations.

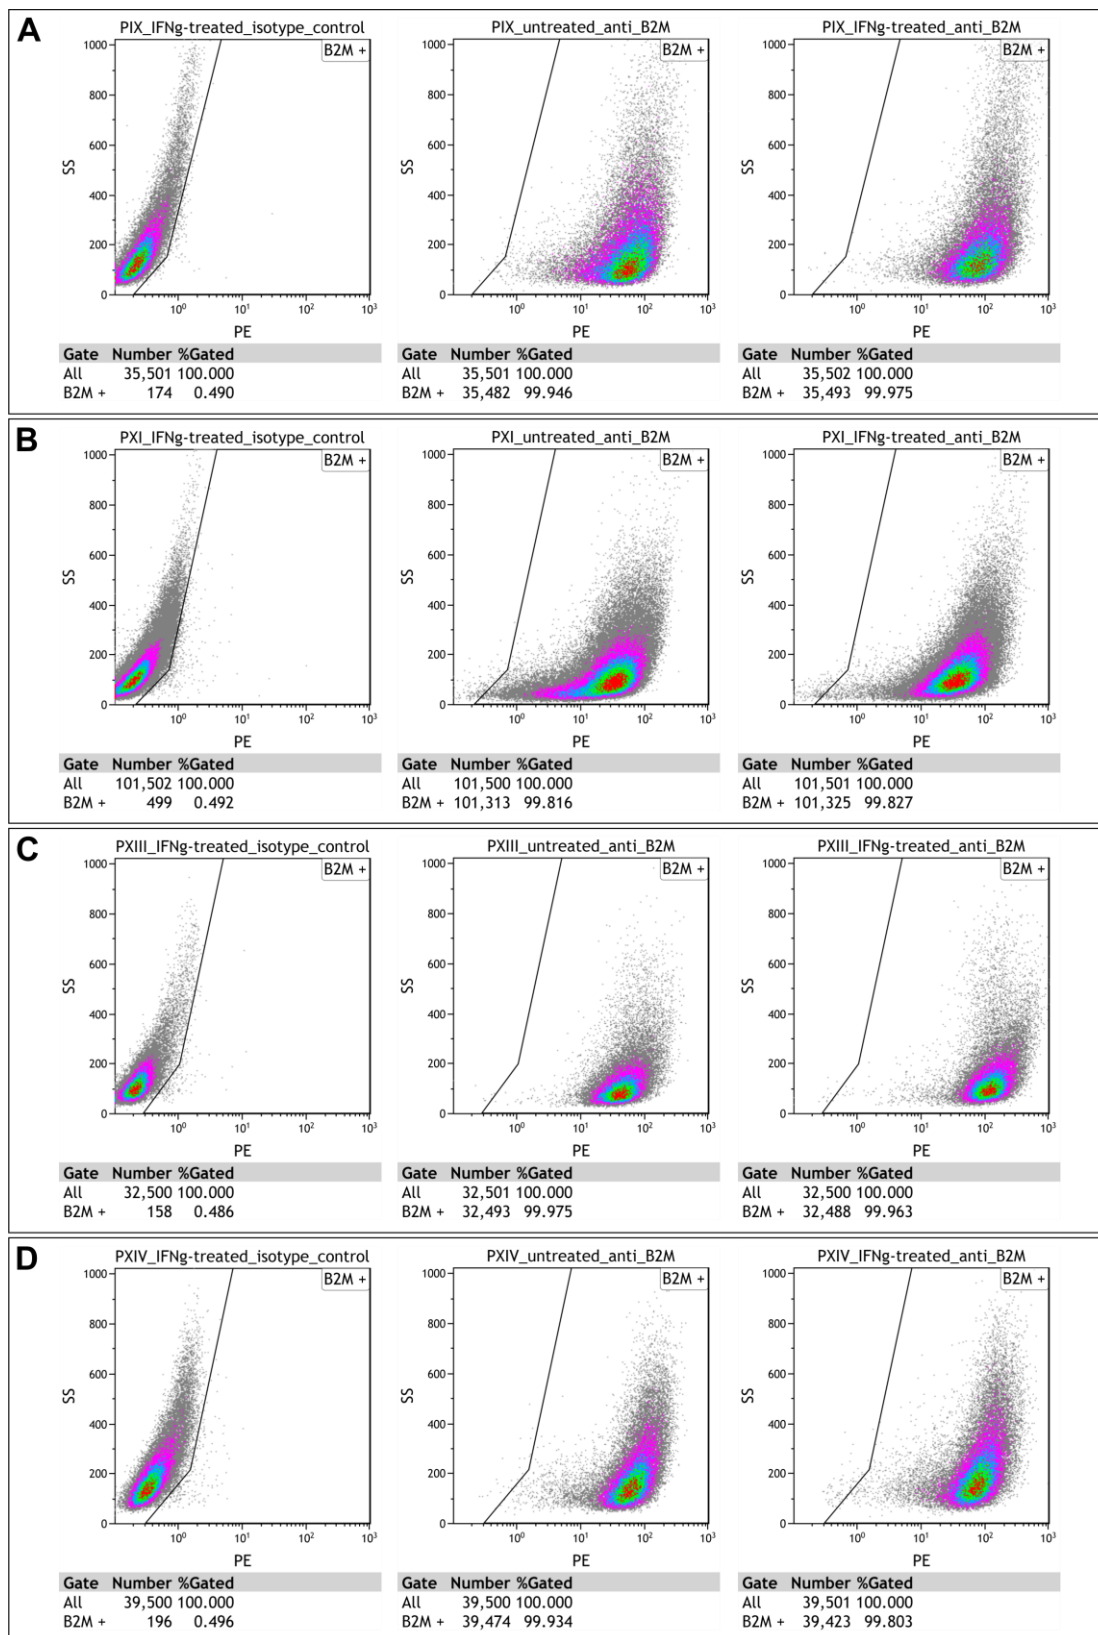

**Figure S9:** Dot plots including gating strategies of flow cytometric-analyzed B2M expressions.

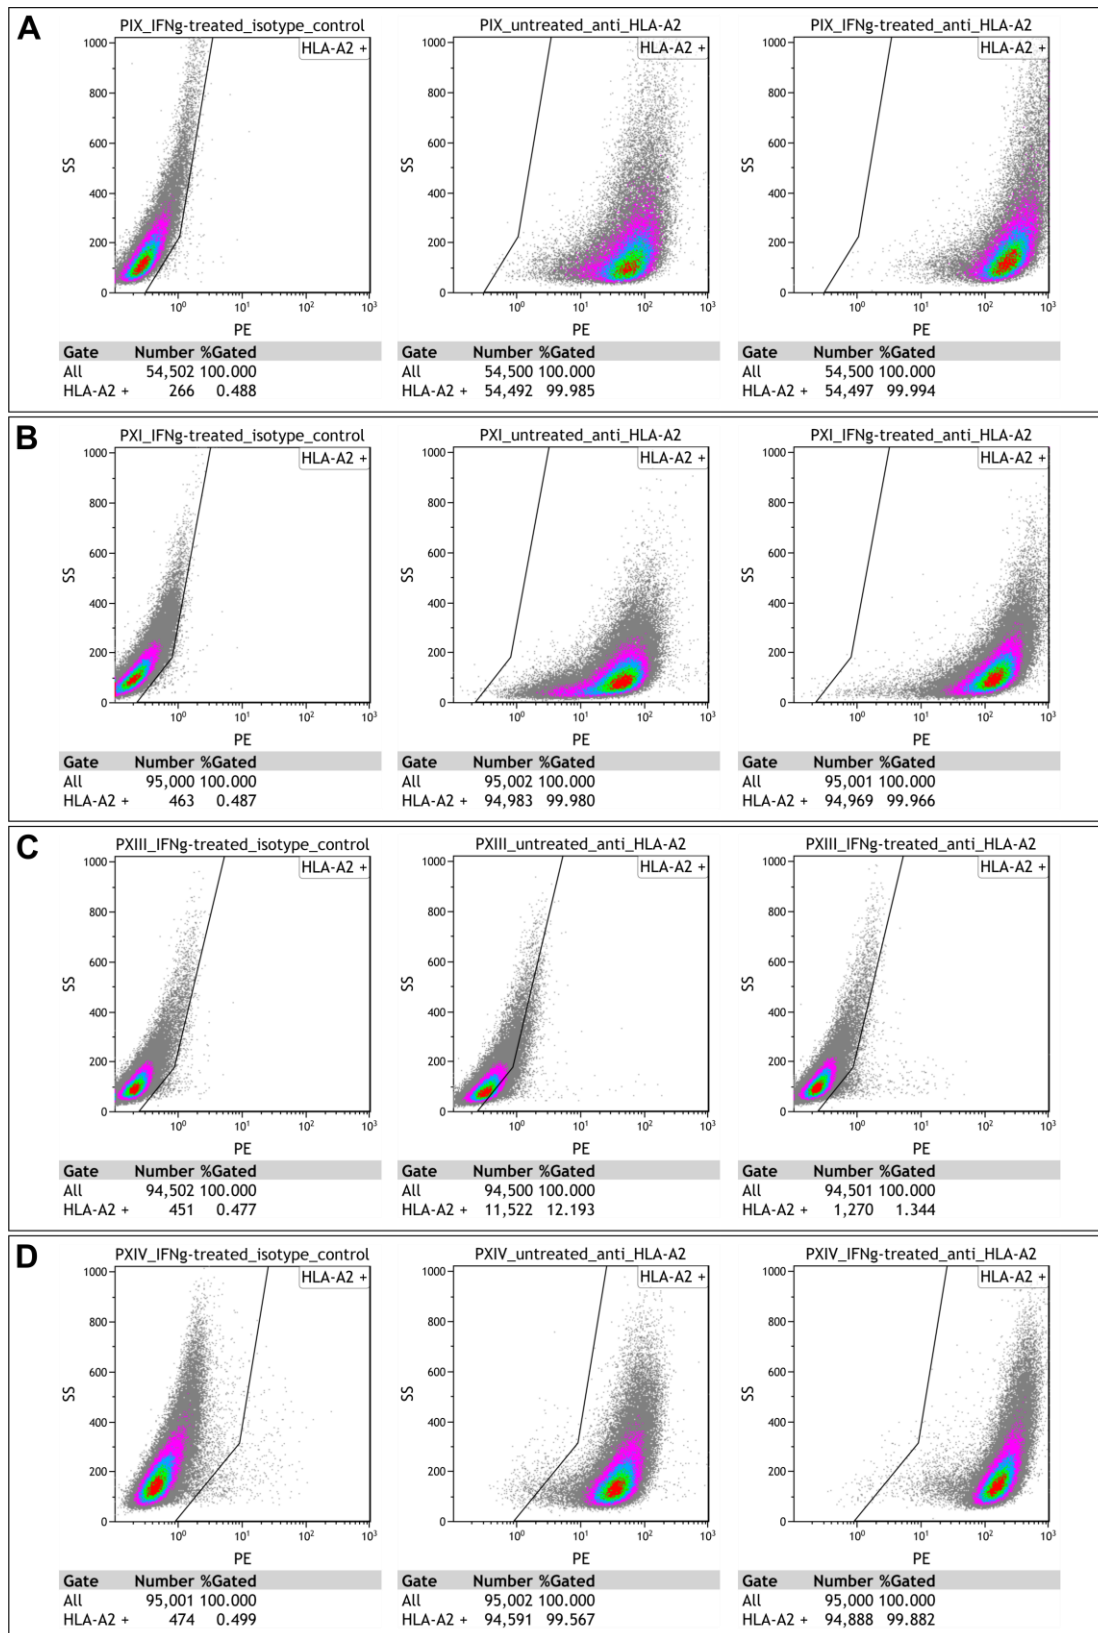

**Figure S10:** Dot plots including gating strategies of flow cytometric-analyzed HLA-A2 expressions.

**Table S2:** Mean fluorescence intensities of B2M and HLA-A2 after flow cytometric analysis.

| Sample ID | Condition                | Mean fluorescence intensity<br>(MFI) B2M | MFI<br>HLA-A2 |
|-----------|--------------------------|------------------------------------------|---------------|
| PIX       | control                  | 67,444                                   | 70,235        |
|           | IFN $\gamma$ pre-treated | 108,696                                  | 296,777       |
| PXI       | control                  | 37,822                                   | 46,91         |
|           | IFN $\gamma$ pre-treated | 50,267                                   | 174,073       |
| PXIII     | control                  | 54,421                                   | 0,451         |
|           | IFN $\gamma$ pre-treated | 146,833                                  | 0,336         |
| PXIV      | control                  | 77,459                                   | 46,265        |
|           | IFN $\gamma$ pre-treated | 93,594                                   | 202,444       |

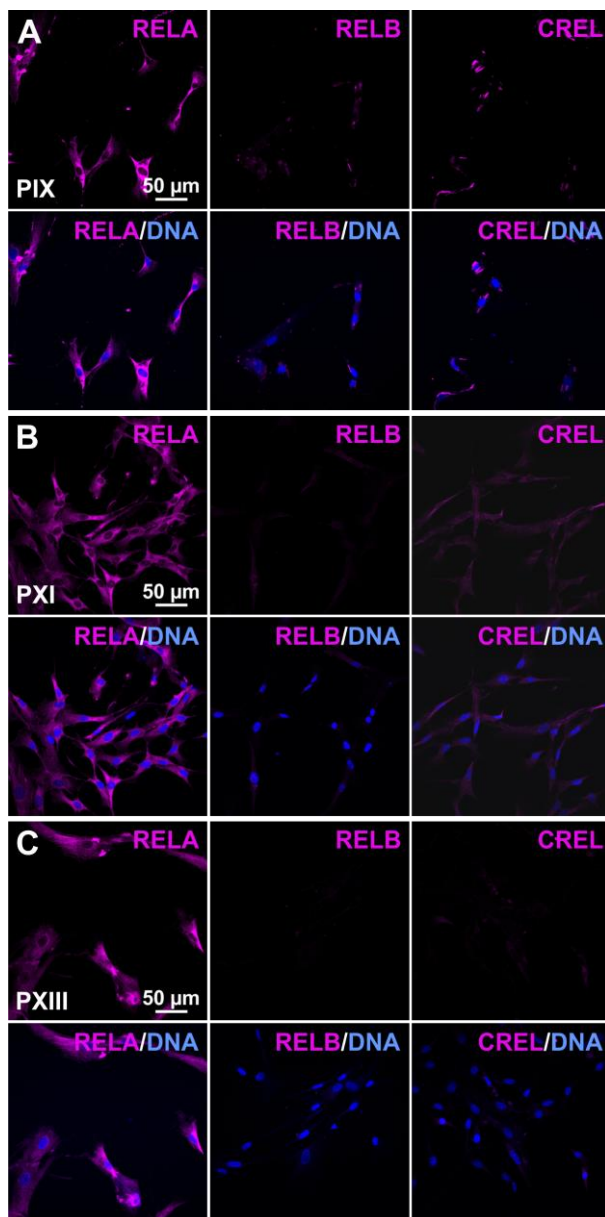

**Figure S11:** Immunocytochemistry of NF- $\kappa$ B subunit expressions in primary PIX, PXI and PXIII PCSCs.

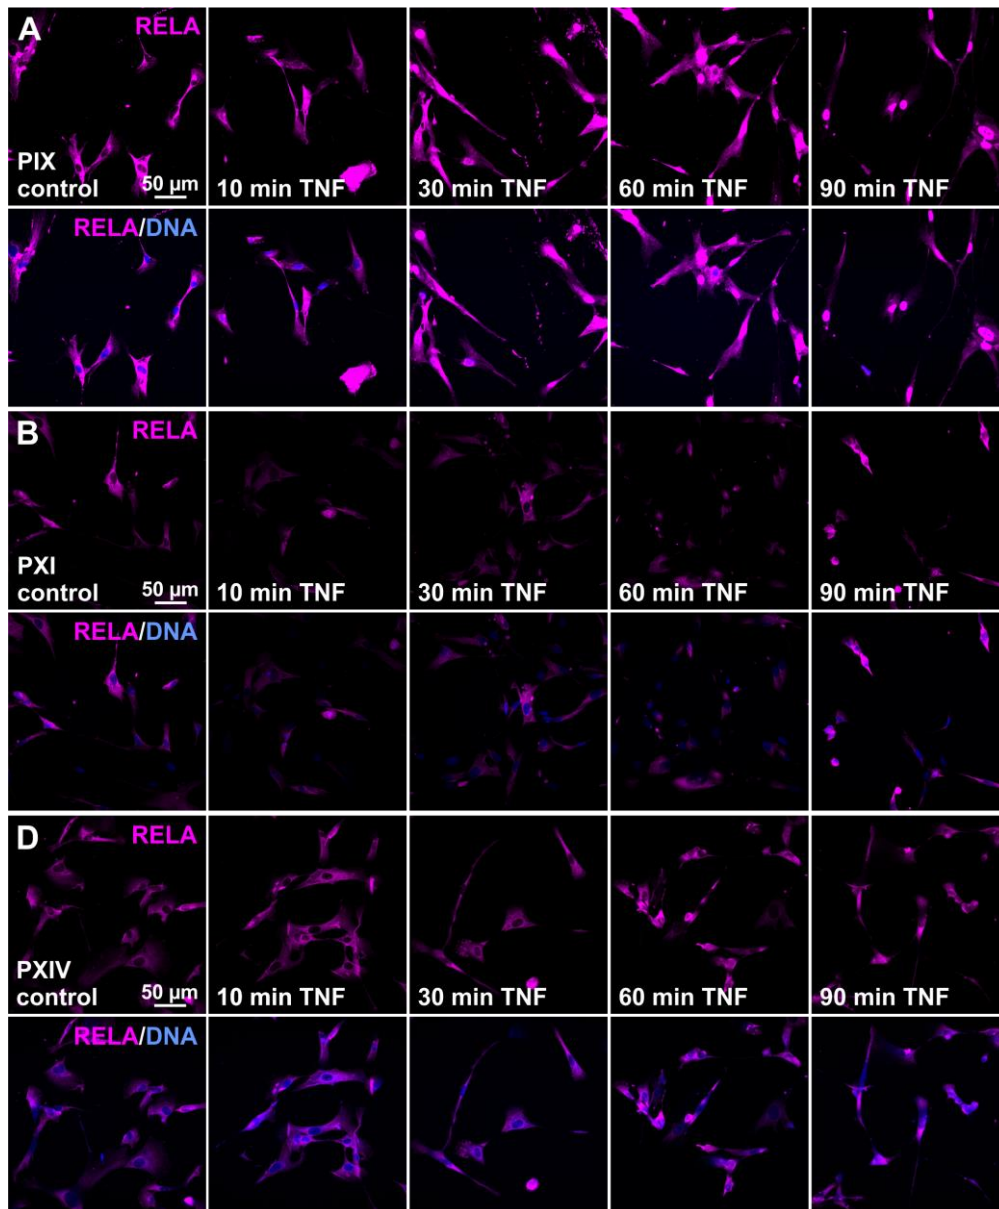

**Figure S12:** Exemplary RELA immunostainings of TNF $\alpha$ -treated PIX, PXI and PXIV PCSC populations.
